# Supplementary material for: Microstructural dynamics of motor learning and sleep-dependent consolidation: A diffusion imaging study
Source: PubMed Central journal article supplement (PMC10696465; doi:10.1016/j.isci.2023.108426), 2023-11-10
Supplement: mmc1.pdf [file mmc1.pdf]

iScience, Volume 26

## **Supplemental information**

### **Microstructural dynamics of motor learning and sleep-dependent consolidation: A diffusion imaging study**

**Whitney Stee, Antoine Legouhy, Michele Guerreri, Thomas Villemonteix, Hui Zhang, and Philippe Peigneux**

## Supplemental Information

**Table S1. Participant’s demographics, related to Experimental Model and Study Participant Details’ section.**

|                                                    | Sleep Deprivation (SD) Group<br>n = 31                  | Regular Sleep (RS) Group<br>n = 30                      | Total sample<br>n = 61                                  |
|----------------------------------------------------|---------------------------------------------------------|---------------------------------------------------------|---------------------------------------------------------|
| Pittsburgh Sleep Quality Index (sleep quality)     | mean score = 3.32<br>SD = 1.14<br>min = 1<br>max = 6    | mean score = 3.33<br>SD = 1.35<br>min = 0<br>max = 5    | mean score = 3.33<br>SD = 1.24<br>min = 0<br>max = 6    |
| Morningness–Eveningness Questionnaire (chronotype) | mean score = 54.71<br>SD = 8.17<br>min = 37<br>max = 73 | mean score = 53.42 SD = 7.56<br>min = 32<br>max = 68    | mean score = 54.07<br>SD = 7.84<br>min = 32<br>max = 73 |
| Edinburgh Inventory (laterality)                   | mean score = 5.68<br>SD = 6.16<br>min = -10<br>max = 10 | mean score = 4.27<br>SD = 6.64<br>min = -10<br>max = 10 | mean score = 4.98<br>SD = 6.39<br>min = -10<br>max = 10 |
| Gender                                             | ♀ = 16<br>♂ = 15                                        | ♀ = 15<br>♂ = 15                                        | ♀ = 31<br>♂ = 30                                        |
| Age                                                | mean score = 21.07<br>SD = 2.35<br>min = 19<br>max = 29 | mean score = 21.57<br>SD = 2.16<br>min = 18<br>max = 29 | mean age = 21.31<br>SD = 2.26<br>min = 18<br>max = 29   |

*Legend:* Detailed information concerning sleep quality, chronotype, laterality, gender, and age with mean (mean score), standard deviation (SD), minimum (min) and maximum (max) for every group and in the total sample.
